# Supplementary material for: Quality assessment and origin tracing of Guangdong Liangcha granules using direct mass spectrometry fingerprinting
Source: Royal Society of Chemistry journal article supplement (doi:10.1039/c2ay25651g), 2012-01-01
Supplement: c2ay25651g.pdf [file c2ay25651g.pdf]

## Electronic Supplementary Information

### Direct mass spectrometry fingerprinting: A simple and efficient method for pharmaceutical product analysis

Jiewei Deng,<sup>§<sup>a</sup></sup> Chunlin Fan,<sup>§<sup>b</sup></sup> Zhengjin Jiang,<sup>c</sup> Wencai Ye,<sup>\*<sup>b</sup></sup> Yunyun Yang<sup>\*<sup>a</sup></sup>

<sup>a</sup> *Guangdong Provincial Public Laboratory of Analysis and Testing Technology, China National Analytical Center Guangzhou, China. Fax: +86 20 8768 1384; Tel: +86 20 3765 6885 823; E-mail: yy\_yang@vip.126.com*

<sup>b</sup> *Institute of Traditional Chinese Medicine and Natural Products, Jinan University, Guangzhou, China. Fax: +86 20 8522 1559; Tel: +86 20 8522 0936; E-mail: chywc@yahoo.com.cn*

<sup>c</sup> *Department of Pharmacy and Guangdong Province Key Laboratory of Pharmacodynamic Constituents of Traditional Chinese Medicine and New Drug Research, Jinan University, Guangzhou, China.*

§ These authors contributed equally to this work.

Table S-1

A summary of the tested samples

| Samples no. | Brand      | Type      | Origins                                             | Batch no. |
|-------------|------------|-----------|-----------------------------------------------------|-----------|
| A01         | Wanglaoji  | Sugarless | Wanglaoji Pharmaceutical Co. Ltd., Guangdong, China | 100203    |
| A02         | Wanglaoji  | Sugarless | Wanglaoji Pharmaceutical Co. Ltd., Guangdong, China | 100401    |
| A03         | Wanglaoji  | Sugarless | Wanglaoji Pharmaceutical Co. Ltd., Guangdong, China | 100611    |
| A04         | Wanglaoji  | Sugarless | Wanglaoji Pharmaceutical Co. Ltd., Guangdong, China | 100706    |
| A05         | Wanglaoji  | Sugarless | Wanglaoji Pharmaceutical Co. Ltd., Guangdong, China | 100801    |
| A06         | Wanglaoji  | Sugarless | Wanglaoji Pharmaceutical Co. Ltd., Guangdong, China | 100804    |
| A07         | Wanglaoji  | Sugarless | Wanglaoji Pharmaceutical Co. Ltd., Guangdong, China | 100810    |
| A08         | Wanglaoji  | Sugarless | Wanglaoji Pharmaceutical Co. Ltd., Guangdong, China | 101103    |
| A09         | Wanglaoji  | Sugarless | Wanglaoji Pharmaceutical Co. Ltd., Guangdong, China | 101112    |
| A10         | Wanglaoji  | Sugarless | Wanglaoji Pharmaceutical Co. Ltd., Guangdong, China | 110307    |
| A11         | Wanglaoji  | Sugarless | Wanglaoji Pharmaceutical Co. Ltd., Guangdong, China | 110508    |
| A12         | Wanglaoji  | Sugarless | Wanglaoji Pharmaceutical Co. Ltd., Guangdong, China | 110601    |
| A13         | Wanglaoji  | Sugarless | Wanglaoji Pharmaceutical Co. Ltd., Guangdong, China | 110609    |
| A14         | Wanglaoji  | Sugarless | Wanglaoji Pharmaceutical Co. Ltd., Guangdong, China | 110705    |
| A15         | Wanglaoji  | Sugarless | Wanglaoji Pharmaceutical Co. Ltd., Guangdong, China | 110719    |
| B01         | Wanglaoji  | Sugar     | Wanglaoji Pharmaceutical Co. Ltd., Guangdong, China | 1012003   |
| B02         | Wanglaoji  | Sugar     | Wanglaoji Pharmaceutical Co. Ltd., Guangdong, China | 1012006   |
| B03         | Wanglaoji  | Sugar     | Wanglaoji Pharmaceutical Co. Ltd., Guangdong, China | 1102106   |
| B04         | Wanglaoji  | Sugar     | Wanglaoji Pharmaceutical Co. Ltd., Guangdong, China | 1103201   |
| B05         | Wanglaoji  | Sugar     | Wanglaoji Pharmaceutical Co. Ltd., Guangdong, China | 1103207   |
| B06         | Wanglaoji  | Sugar     | Wanglaoji Pharmaceutical Co. Ltd., Guangdong, China | 1104120   |
| B07         | Wanglaoji  | Sugar     | Wanglaoji Pharmaceutical Co. Ltd., Guangdong, China | 1104145   |
| B08         | Wanglaoji  | Sugar     | Wanglaoji Pharmaceutical Co. Ltd., Guangdong, China | 1105012   |
| B09         | Wanglaoji  | Sugar     | Wanglaoji Pharmaceutical Co. Ltd., Guangdong, China | 1105141   |
| B10         | Wanglaoji  | Sugar     | Wanglaoji Pharmaceutical Co. Ltd., Guangdong, China | 1105147   |
| B11         | Wanglaoji  | Sugar     | Wanglaoji Pharmaceutical Co. Ltd., Guangdong, China | 1106061   |
| B12         | Wanglaoji  | Sugar     | Wanglaoji Pharmaceutical Co. Ltd., Guangdong, China | 1107101   |
| C01         | Xiangxue   | Sugar     | Huazhou Chinese Medicine Co. Ltd., Guangdong, China | 20100905  |
| C02         | Xiangxue   | Sugar     | Huazhou Chinese Medicine Co. Ltd., Guangdong, China | 20110302  |
| C03         | Xiangxue   | Sugar     | Huazhou Chinese Medicine Co. Ltd., Guangdong, China | 20110304  |
| C04         | Xiangxue   | Sugar     | Huazhou Chinese Medicine Co. Ltd., Guangdong, China | 20110401  |
| C05         | Xiangxue   | Sugar     | Huazhou Chinese Medicine Co. Ltd., Guangdong, China | 20110501  |
| C06         | Xiangxue   | Sugar     | Huazhou Chinese Medicine Co. Ltd., Guangdong, China | 20110502  |
| C07         | Xiangxue   | Sugar     | Huazhou Chinese Medicine Co. Ltd., Guangdong, China | 20110503  |
| C08         | Xiangxue   | Sugar     | Huazhou Chinese Medicine Co. Ltd., Guangdong, China | 20110904  |
| D01         | Guanhe     | Sugar     | Luofushan Baihe Pharmaceutical Co. Ltd., Guangdong, | 1011010   |
| D02         | Guanhe     | Sugar     | Luofushan Baihe Pharmaceutical Co. Ltd., Guangdong, | 1106005   |
| D03         | Guanhe     | Sugar     | Luofushan Baihe Pharmaceutical Co. Ltd., Guangdong, | 1107008   |
| D04         | Guanhe     | Sugar     | Luofushan Baihe Pharmaceutical Co. Ltd., Guangdong, | 1107009   |
| D05         | Guanhe     | Sugar     | Luofushan Baihe Pharmaceutical Co. Ltd., Guangdong, | 1107010   |
| D06         | Guanhe     | Sugar     | Luofushan Baihe Pharmaceutical Co. Ltd., Guangdong, | 1108011   |
| E01         | Longma     | Sugar     | Yikang Pharmaceutical Co. Ltd., Guangdong, China    | 101110    |
| E02         | Longma     | Sugar     | Yikang Pharmaceutical Co. Ltd., Guangdong, China    | 110205    |
| F01         | Suyongkang | Sugar     | Guoyitang Pharmaceutical Co. Ltd., Guangdong, China | 100801    |
| F02         | Suyongkang | Sugar     | Guoyitang Pharmaceutical Co. Ltd., Guangdong, China | 100802    |

Table S-2

The major constituents detected in GLG by HPLC–ESI–TOF/IT–MS and direct ESI–TOF–MS in negative-ion mode.

| Peaks of HPLC | $t_R$ of HPLC (min) | Deduced molecular formula                       | Theoretical molecular weight | Experimental mass of deprotonated molecule by ESI–TOF–MS ( $m/z$ ) / error (ppm) | Negative ESI–IT–MS ( $m/z$ ) parent ion/ fragmental ions | Identification                                 |
|---------------|---------------------|-------------------------------------------------|------------------------------|----------------------------------------------------------------------------------|----------------------------------------------------------|------------------------------------------------|
| 1             | 1.57                | C <sub>6</sub> H <sub>12</sub> O <sub>7</sub>   | 196.0538                     | 195.0511 [M–H] <sup>–</sup> /–0.38                                               | 195/129, 177, 159, 99                                    | gluconic acid <sup>a)</sup>                    |
| 2             | 1.79                | C <sub>7</sub> H <sub>12</sub> O <sub>6</sub>   | 192.0634                     | 191.0566 [M–H] <sup>–</sup> /–2.70                                               | 191/85, 173, 127, 93, 111                                | quinic acid <sup>a)</sup>                      |
| 3             | 2.23                | C <sub>4</sub> H <sub>6</sub> O <sub>5</sub>    | 134.0215                     | 133.0144 [M–H] <sup>–</sup> /–1.14                                               | 133/115                                                  | malic acid <sup>a)</sup>                       |
| 4             | 4.01                | C <sub>7</sub> H <sub>12</sub> O <sub>6</sub>   | 192.0634                     | 191.0566 [M–H] <sup>–</sup> /–2.7                                                | 191/111, 173                                             | citric acid <sup>a)</sup>                      |
| 5             | 4.21                | C <sub>5</sub> H <sub>7</sub> NO <sub>3</sub>   | 129.0426                     | 128.0354 [M–H] <sup>–</sup> /–0.88                                               | 128/84, 99                                               | –                                              |
| 6             | 4.74                | C <sub>7</sub> H <sub>11</sub> NO <sub>5</sub>  | 189.0637                     | 188.0561 [M–H] <sup>–</sup> /–2.04                                               | 188/170,128                                              | –                                              |
| 7             | 5.41                | C <sub>8</sub> H <sub>10</sub> O <sub>7</sub>   | 218.0427                     | 217.0349 [M–H] <sup>–</sup> /2.23                                                | 217/199, 155                                             | –                                              |
| 8             | 6.05                | C <sub>7</sub> H <sub>8</sub> O <sub>6</sub>    | 188.0321                     | 187.0251 [M–H] <sup>–</sup> /–1.69                                               | 187/169, 127, 142                                        | –                                              |
| 9             | 6.31                | C <sub>6</sub> H <sub>10</sub> O <sub>5</sub>   | 162.0528                     | 161.0451 [M–H] <sup>–</sup> /2.51                                                | 161/99                                                   | –                                              |
| 10            | 7.63                | C <sub>8</sub> H <sub>11</sub> NO <sub>5</sub>  | 201.0637                     | 200.0568 [M–H] <sup>–</sup> /–1.66                                               | 200/156                                                  | –                                              |
| 11            | 8.39                | C <sub>7</sub> H <sub>6</sub> O <sub>5</sub>    | 170.0215                     | 169.0140 [M–H] <sup>–</sup> /1.46                                                | 169/125                                                  | gallic acid <sup>a)</sup>                      |
| 12            | 8.68                | C <sub>8</sub> H <sub>6</sub> O <sub>6</sub>    | 198.0164                     | 197.0088 [M–H] <sup>–</sup> /1.88                                                | 197/153,109                                              | –                                              |
| 13            | 9.93                | C <sub>9</sub> H <sub>14</sub> O <sub>5</sub>   | 202.0841                     | 201.0769 [M–H] <sup>–</sup> /–0.11                                               | 201/139, 109, 127, 159                                   | –                                              |
| 14            | 10.35               | C <sub>12</sub> H <sub>22</sub> O <sub>9</sub>  | 310.1264                     | 309.1187 [M–H] <sup>–</sup> /1.18                                                | 309/263, 179                                             | –                                              |
| 15            | 12.22               | C <sub>7</sub> H <sub>10</sub> O <sub>6</sub>   | 190.0477                     | 189.0399 [M–H] <sup>–</sup> /2.64                                                | 189/171                                                  | –                                              |
| 16            | 12.54               | C <sub>23</sub> H <sub>17</sub> O               | 310.1264                     | 309.1294 [M–H] <sup>–</sup> /–0.95                                               | 309/263, 179                                             | –                                              |
| 17            | 12.96               | C <sub>23</sub> H <sub>17</sub> O               | 310.1264                     | 309.1297 [M–H] <sup>–</sup> /–1.92                                               | 309/263, 179                                             | –                                              |
| 18            | 13.23               | C <sub>23</sub> H <sub>17</sub> O               | 310.1264                     | 309.1294 [M–H] <sup>–</sup> /–0.95                                               | 309/263, 179                                             | –                                              |
| 19            | 13.67               | C <sub>23</sub> H <sub>17</sub> O               | 310.1264                     | 309.1287 [M–H] <sup>–</sup> /–0.68                                               | 309/263, 179                                             | –                                              |
| 20            | 14.58               | C <sub>7</sub> H <sub>8</sub> O <sub>6</sub>    | 188.0321                     | 187.0249 [M–H] <sup>–</sup> /–0.63                                               | 187/143, 99, 125                                         | –                                              |
| 21            | 15.42               | C <sub>7</sub> H <sub>6</sub> O <sub>4</sub>    | 154.0266                     | 153.1958 [M–H] <sup>–</sup> /–1.62                                               | 153/109                                                  | protocatechuic acid <sup>a)</sup>              |
| 22            | 15.73               | C <sub>9</sub> H <sub>14</sub> O <sub>8</sub>   | 250.0689                     | 249.0613 [M–H] <sup>–</sup> /1.00                                                | 249/231, 217, 199, 155                                   | –                                              |
| 23            | 16.72               | C <sub>15</sub> H <sub>18</sub> O <sub>9</sub>  | 342.0951                     | 341.0880 [M–H] <sup>–</sup> /–0.57                                               | 341/203, 323                                             | –                                              |
| 24            | 16.89               | C <sub>9</sub> H <sub>12</sub> O <sub>7</sub>   | 232.0583                     | 231.0501 [M–H] <sup>–</sup> /–0.74                                               | 231/185, 203,199,155                                     | –                                              |
| 25            | 17.89               | C <sub>15</sub> H <sub>18</sub> O <sub>9</sub>  | 342.0951                     | 341.0877 [M–H] <sup>–</sup> /0.31                                                | 341/203, 323                                             | –                                              |
| 26            | 18.48               | C <sub>15</sub> H <sub>18</sub> O <sub>9</sub>  | 342.0951                     | 341.0876 [M–H] <sup>–</sup> /0.60                                                | 341/203, 323                                             | –                                              |
| 27            | 20.03               | C <sub>7</sub> H <sub>6</sub> O <sub>3</sub>    | 138.0317                     | 137.0243 [M–H] <sup>–</sup> /0.86                                                | 137/109, 91                                              | –                                              |
| 28            | 20.19               | C <sub>15</sub> H <sub>18</sub> O <sub>9</sub>  | 342.0951                     | 341.0874 [M–H] <sup>–</sup> /1.19                                                | 341/203, 179, 233, 281, 323                              | –                                              |
| 29            | 20.55               | C <sub>16</sub> H <sub>18</sub> O <sub>9</sub>  | 354.0951                     | 353.0884 [M–H] <sup>–</sup> /–1.68                                               | 353/191, 179, 135                                        | 5- <i>O</i> -caffeoylquinic acid <sup>a)</sup> |
| 30            | 20.84               | C <sub>7</sub> H <sub>6</sub> O <sub>3</sub>    | 138.0317                     | 137.0242 [M–H] <sup>–</sup> /1.59                                                | 137/93                                                   | 4-hydroxybenzoic acid <sup>a)</sup>            |
| 31            | 22.03               | C <sub>14</sub> H <sub>16</sub> O <sub>8</sub>  | 312.0845                     | 311.0771 [M–H] <sup>–</sup> /0.61                                                | 311/191                                                  | –                                              |
| 32            | 22.21               | C <sub>10</sub> H <sub>16</sub> O <sub>8</sub>  | 264.0845                     | 263.0768 [M–H] <sup>–</sup> /1.67                                                | 263/231                                                  | abscisic acid                                  |
| 33            | 22.62               | C <sub>14</sub> H <sub>16</sub> O <sub>8</sub>  | 312.0845                     | 311.0768 [M–H] <sup>–</sup> /1.35                                                | 311/173, 137                                             | –                                              |
| 34            | 23.03               | C <sub>15</sub> H <sub>18</sub> O <sub>9</sub>  | 342.0951                     | 341.0877 [M–H] <sup>–</sup> /0.31                                                | 341/281, 251, 179, 321, 221                              | –                                              |
| 35            | 24.63               | C <sub>15</sub> H <sub>18</sub> O <sub>9</sub>  | 342.0951                     | 341.0873 [M–H] <sup>–</sup> /1.48                                                | 341/281, 251, 179, 321, 221                              | –                                              |
| 36            | 25.35               | C <sub>16</sub> H <sub>18</sub> O <sub>9</sub>  | 354.0951                     | 353.0882 [M–H] <sup>–</sup> /–1.12                                               | 353/191, 179, 135                                        | 3- <i>O</i> -caffeoylquinic acid <sup>a)</sup> |
| 37            | 26.11               | C <sub>9</sub> H <sub>8</sub> O <sub>4</sub>    | 180.0423                     | 179.0347 [M–H] <sup>–</sup> /1.58                                                | 179/135                                                  | caffeic acid <sup>a)</sup>                     |
| 38            | 26.28               | C <sub>16</sub> H <sub>18</sub> O <sub>9</sub>  | 354.0951                     | 353.0882 [M–H] <sup>–</sup> /–1.12                                               | 353/173, 179, 191                                        | 4- <i>O</i> -caffeoylquinic acid <sup>a)</sup> |
| 39            | 27.02               | C <sub>13</sub> H <sub>8</sub> O <sub>8</sub>   | 292.0219                     | 291.0148 [M–H] <sup>–</sup> /–0.61                                               | 291/247                                                  | –                                              |
| 40            | 28.12               | C <sub>15</sub> H <sub>18</sub> O <sub>8</sub>  | 326.1002                     | 325.0926 [M–H] <sup>–</sup> /1.05                                                | 325/265, 237                                             | –                                              |
| 41            | 28.57               | C <sub>18</sub> H <sub>28</sub> O <sub>9</sub>  | 388.1733                     | 387.1665 [M–H] <sup>–</sup> /–1.14                                               | 387/207, 163, 369                                        | –                                              |
| 42            | 29.33               | C <sub>27</sub> H <sub>22</sub> O <sub>18</sub> | 634.0806                     | 633.0741 [M–H] <sup>–</sup> /–1.20                                               | 633/301, 463, 275                                        | –                                              |
| 43            | 30.36               | C <sub>27</sub> H <sub>30</sub> O <sub>15</sub> | 594.1585                     | 593.1501 [M–H] <sup>–</sup> /1.84                                                | 593/473, 503, 353, 575, 503                              | multiflorin                                    |
| 44            | 30.71               | C <sub>12</sub> H <sub>18</sub> O <sub>4</sub>  | 226.1205                     | 225.1128 [M–H] <sup>–</sup> /1.91                                                | 255/181, 207, 147, 165,135                               | –                                              |
| 45            | 31.71               | C <sub>9</sub> H <sub>8</sub> O <sub>3</sub>    | 164.0473                     | 163.0399 [M–H] <sup>–</sup> /0.90                                                | 163/119                                                  | p-coumaric acid <sup>a)</sup>                  |
| 46            | 31.98               | C <sub>12</sub> H <sub>8</sub> O <sub>6</sub>   | 248.0321                     | 247.0245 [M–H] <sup>–</sup> /1.14                                                | 247/191, 219, 203                                        | –                                              |
| 47            | 32.67               | C <sub>26</sub> H <sub>28</sub> O <sub>14</sub> | 564.1479                     | 563.1396 [M–H] <sup>–</sup> /1.08                                                | 563/443, 473, 383, 353, 545                              | –                                              |

|    |        |                                                   |          |                                       |                             |                                             |
|----|--------|---------------------------------------------------|----------|---------------------------------------|-----------------------------|---------------------------------------------|
| 48 | 33.93  | C <sub>21</sub> H <sub>20</sub> O <sub>11</sub>   | 448.1006 | 447.0937 [M-H] <sup>-</sup> /-0.93    | 447/357, 327, 429           | isoorientin                                 |
| 49 | 35.19  | C <sub>22</sub> H <sub>26</sub> O <sub>11</sub>   | 466.1475 | 465.1408 [M-H] <sup>-</sup> /-1.22    | 465/285, 303, 137, 241      | -                                           |
| 50 | 36.84  | C <sub>26</sub> H <sub>28</sub> O <sub>14</sub>   | 564.1479 | 563.1397 [M-H] <sup>-</sup> //1.65    | 563/473, 443, 353, 383, 455 | -                                           |
| 51 | 37.81  | C <sub>23</sub> H <sub>28</sub> O <sub>12</sub>   | 496.1581 | 495.1510 [M-H] <sup>-</sup> /-0.38    | 495/281, 451, 375, 357, 151 | -                                           |
| 52 | 38.23  | C <sub>23</sub> H <sub>28</sub> O <sub>12</sub>   | 496.1581 | 431.0993 [M-H] <sup>-</sup> /-2.16    | 431/311, 341, 413           | apigenin-8-C-glucoside <sup>a)</sup>        |
| 53 | 39.43  | C <sub>21</sub> H <sub>20</sub> O <sub>10</sub>   | 432.1056 | 431.0989 [M-H] <sup>-</sup> /-1.23    | 431/311, 341, 413           | -                                           |
| 54 | 40.23  | C <sub>25</sub> H <sub>30</sub> O <sub>13</sub>   | 538.1686 | 537.1620 [M-H] <sup>-</sup> /-1.09    | 537/493, 161, 323           | -                                           |
| 55 | 41.18  | C <sub>21</sub> H <sub>20</sub> O <sub>12</sub>   | 464.0955 | 463.0877 [M-H] <sup>-</sup> /1.08     | 463/301                     | qercetin-3-O-β-D-glucoside <sup>a)</sup>    |
| 56 | 43.84  | C <sub>9</sub> H <sub>12</sub> O <sub>4</sub>     | 184.0736 | 183.0666 [M-H] <sup>-</sup> /-1.73    | 183/137                     | -                                           |
| 57 | 45.55  | C <sub>9</sub> H <sub>16</sub> O <sub>4</sub>     | 188.1049 | 187.0973 [M-H] <sup>-</sup> /1.71     | 187/125                     | -                                           |
| 58 | 46.57  | C <sub>25</sub> H <sub>24</sub> O <sub>12</sub>   | 516.1268 | 515.1201 [M-H] <sup>-</sup> /-1.17    | 515/353                     | 4,5-di-O- caffeoylquinic acid <sup>a)</sup> |
| 59 | 46.95  | C <sub>26</sub> H <sub>28</sub> O <sub>15</sub>   | 580.1428 | 579.1364 [M-H] <sup>-</sup> /-1.48    | 579/417, 541                | -                                           |
| 60 | 48.45  | C <sub>25</sub> H <sub>24</sub> O <sub>12</sub>   | 516.1268 | 515.1202 [M-H] <sup>-</sup> /-1.36    | 515/353                     | 3,5-di-O- caffeoylquinic acid <sup>a)</sup> |
| 61 | 54.87  | C <sub>25</sub> H <sub>24</sub> O <sub>12</sub>   | 516.1268 | 515.1199 [M-H] <sup>-</sup> /-0.78    | 515/353                     | 3,4-di-O- caffeoylquinic acid <sup>a)</sup> |
| 62 | 55.81  | C <sub>36</sub> H <sub>34</sub> O <sub>16</sub>   | 722.1847 | 721.1782 [M-H] <sup>-</sup> /-1.08    | 721/541                     | -                                           |
| 63 | 57.41  | C <sub>21</sub> H <sub>18</sub> O <sub>12</sub>   | 462.0798 | 461.0736 [M-H] <sup>-</sup> /-2.19    | 461/285                     | -                                           |
| 64 | 59.69  | C <sub>21</sub> H <sub>20</sub> O <sub>10</sub>   | 432.1056 | 431.0977 [M-H] <sup>-</sup> /1.55     | 431/269                     | vitexin/isovitexin                          |
| 65 | 62.33  | C <sub>25</sub> H <sub>30</sub> O <sub>12</sub>   | 522.1737 | 521.1672 [M-H] <sup>-</sup> /-1.36    | 521/315, 163, 297, 357      | -                                           |
| 66 | 63.38  | C <sub>36</sub> H <sub>58</sub> O <sub>11</sub>   | 666.3979 | 711.3965[M+HCOO] <sup>-</sup> /-0.61  | 711/503                     | -                                           |
| 67 | 66.18  | C <sub>15</sub> H <sub>10</sub> O <sub>6</sub>    | 286.0477 | 285.0410 [M-H] <sup>-</sup> /-1.88    | 285/241, 199, 175, 151      | -                                           |
| 68 | 69.04  | C <sub>36</sub> H <sub>58</sub> O <sub>11</sub>   | 666.3979 | 711.3963 [M+HCOO] <sup>-</sup> /-0.29 | 711/503                     | -                                           |
| 69 | 77.51  | C <sub>36</sub> H <sub>58</sub> O <sub>11</sub>   | 666.3979 | 711.3964 [M+HCOO] <sup>-</sup> /-0.43 | 711/503                     | -                                           |
| 70 | 84.35  | C <sub>36</sub> H <sub>58</sub> O <sub>10</sub>   | 650.4030 | 695.4016 [M+HCOO] <sup>-</sup> /-0.58 | 695/487                     | -                                           |
| 71 | 85.06  | C <sub>36</sub> H <sub>58</sub> O <sub>10</sub>   | 650.4030 | 695.4019 [M+HCOO] <sup>-</sup> /-1.01 | 695/487                     | -                                           |
| 72 | 85.46  | C <sub>36</sub> H <sub>56</sub> O <sub>14</sub> S | 744.3391 | 743.3336 [M-H] <sup>-</sup> /-2.42    | 743/663, 255                | -                                           |
| 73 | 85.98  | C <sub>42</sub> H <sub>66</sub> O <sub>18</sub> S | 890.3970 | 889.3902 [M-H] <sup>-</sup> /-0.55    | 889/809, 727, 647, 255      | -                                           |
| 74 | 86.42  | C <sub>36</sub> H <sub>58</sub> O <sub>10</sub>   | 650.4030 | 695.4020 [M+HCOO] <sup>-</sup> /-1.15 | 695/487                     | -                                           |
| 75 | 87.62  | C <sub>41</sub> H <sub>66</sub> O <sub>16</sub> S | 846.4072 | 845.4015 [M-H] <sup>-</sup> /-1.91    | 845/683                     | -                                           |
| 76 | 88.31  | C <sub>18</sub> H <sub>34</sub> O <sub>5</sub>    | 330.2406 | 329.2339 [M-H] <sup>-</sup> /-1.76    | 329/311, 293, 229, 211      | tricin                                      |
| 77 | 91.77  | C <sub>41</sub> H <sub>66</sub> O <sub>16</sub> S | 846.4072 | 845.4013 [M-H] <sup>-</sup> /-1.68    | 845/683                     | -                                           |
| 78 | 94.38  | C <sub>36</sub> H <sub>56</sub> O <sub>14</sub> S | 744.3391 | 743.3330 [M-H] <sup>-</sup> /-1.61    | 743/663, 255                | -                                           |
| 79 | 94.56  | C <sub>42</sub> H <sub>64</sub> O <sub>17</sub> S | 872.3864 | 871.3808 [M-H] <sup>-</sup> /-1.90    | 871/791, 709, 629, 255      | -                                           |
| 80 | 94.87  | C <sub>42</sub> H <sub>64</sub> O <sub>18</sub> S | 888.3813 | 887.3758 [M-H] <sup>-</sup> /-1.96    | 887/725, 827, 665           | -                                           |
| 81 | 95.19  | C <sub>42</sub> H <sub>64</sub> O <sub>17</sub> S | 872.3864 | 871.3804 [M-H] <sup>-</sup> /-1.44    | 871/791, 709, 629, 255      | -                                           |
| 82 | 96.57  | C <sub>34</sub> H <sub>68</sub> O <sub>20</sub> S | 828.4025 | 827.3935 [M-H] <sup>-</sup> /2.04     | 827/665, 621                | -                                           |
| 83 | 99.82  | C <sub>37</sub> H <sub>58</sub> O <sub>12</sub> S | 726.3649 | 725.3589 [M-H] <sup>-</sup> /-1.76    | 725/645, 255, 681,549, 601  | -                                           |
| 84 | 101.93 | C <sub>36</sub> H <sub>56</sub> O <sub>13</sub> S | 728.3442 | 727.3381 [M-H] <sup>-</sup> /-1.67    | 727/647, 255                | -                                           |
| 85 | 102.76 | C <sub>35</sub> H <sub>56</sub> O <sub>11</sub> S | 684.3543 | 683.3481 [M-H] <sup>-</sup> /-1.52    | 683/639, 603, 569, 513, 433 | -                                           |
| 86 | 102.86 | C <sub>36</sub> H <sub>56</sub> O <sub>13</sub> S | 728.3442 | 727.3378 [M-H] <sup>-</sup> /-1.25    | 727/647, 255                | -                                           |
| 87 | 102.93 | C <sub>35</sub> H <sub>56</sub> O <sub>11</sub> S | 684.3543 | 683.3478 [M-H] <sup>-</sup> /-1.09    | 683/639, 603, 569, 513, 433 | -                                           |
| 88 | 103.91 | C <sub>36</sub> H <sub>56</sub> O <sub>13</sub> S | 728.3442 | 727.3375 [M-H] <sup>-</sup> /-0.84    | 727/647, 255, 551           | -                                           |
| 89 | 104.78 | C <sub>34</sub> H <sub>68</sub> O <sub>20</sub> S | 828.4025 | 827.3942 [M-H] <sup>-</sup> /1.19     | 827/783                     | -                                           |
| 90 | 107.21 | C <sub>35</sub> H <sub>56</sub> O <sub>11</sub> S | 684.3543 | 683.3485 [M-H] <sup>-</sup> /-2.11    | 683/639, 603, 569, 513, 433 | -                                           |
| 91 | 109.84 | C <sub>36</sub> H <sub>54</sub> O <sub>12</sub> S | 710.3336 | 709.3274 [M-H] <sup>-</sup> /-1.52    | 709/629, 255, 665           | -                                           |
| 92 | 110.95 | C <sub>36</sub> H <sub>54</sub> O <sub>12</sub> S | 710.3336 | 709.3271 [M-H] <sup>-</sup> /-1.10    | 709/629, 255, 665           | -                                           |
| 93 | 111.56 | C <sub>36</sub> H <sub>54</sub> O <sub>12</sub> S | 710.3336 | 709.3273 [M-H] <sup>-</sup> /-1.38    | 709/629, 255, 665           | -                                           |
| 94 | 112.19 | C <sub>37</sub> H <sub>58</sub> O <sub>12</sub> S | 726.3649 | 725.3586 [M-H] <sup>-</sup> /-1.35    | 725/665, 621, 647, 585      | -                                           |
| 95 | 113.31 | C <sub>35</sub> H <sub>54</sub> O <sub>10</sub> S | 666.3438 | 665.3378 [M-H] <sup>-</sup> /-1.69    | 665/621                     | -                                           |
| 96 | 114.13 | C <sub>36</sub> H <sub>56</sub> O <sub>12</sub> S | 712.3518 | 711.3432 [M-H] <sup>-</sup> /-1.72    | 711/631, 255, 667           | -                                           |
| 97 | 114.91 | C <sub>36</sub> H <sub>54</sub> O <sub>12</sub> S | 710.3336 | 709.3280 [M-H] <sup>-</sup> /-2.36    | 709/629, 255, 665           | -                                           |
| 98 | 117.81 | C <sub>39</sub> H <sub>40</sub> O <sub>3</sub>    | 556.2977 | 555.2898 [M-H] <sup>-</sup> /1.2      | 555/225, 299, 255, 165      | -                                           |

<sup>a)</sup> The identity was confirmed by comparing its *t<sub>R</sub>*, UV spectra, ESI-TOF-MS and ESI-IT-MS data with those of the reference substances.
